# Supplementary material for: Comparison of Compartmental and Non-Compartmental Analysis to Detect Biopharmaceutical Similarity of Intravenous Nanomaterial-Based Rifabutin Formulations
Source: MDPI journal article supplement (doi:10.3390/pharmaceutics15041258), 2023-04-17
Supplement: s1 [file s1]

Supplementary material to the article:

## Comparison of Compartmental and Non-Compartmental Analysis to Detect Biopharmaceutical Similarity of Intravenous Nanomaterial-based Rifabutin Formulations

Nadezhda Osipova, Andrey Budko, Olga Maksimenko, Elena Shipulo, Ludmila Vanchugova, Wenqian Chen, Svetlana Gelperina, Matthias G. Wacker

Correspondence should be directed to [svetlana.gelperina@gmail.com](mailto:svetlana.gelperina@gmail.com)  
and [matthias.g.wacker@nus.edu.sg](mailto:matthias.g.wacker@nus.edu.sg)

---

*Table S1. Release rate and carrier half-life identified by the PBNB model. The values were used to calculate the relative (percentage) difference in the contour map.*

| Formulation | $k_{rel}$ [h <sup>-1</sup> ] | SD   | Carrier half-life [h] | SD      |
|-------------|------------------------------|------|-----------------------|---------|
| HSA low     | 460.1                        | 10.2 | 0.00055               | 0.00000 |
| HSA medium  | 16.3                         | 0.0  | 0.00040               | 0.00000 |
| PLGA high   | 0.4                          | 0.0  | 0.00094               | 0.00000 |
| PLGA low    | 170.0                        | 17.0 | 0.00064               | 0.00008 |
| PLGA medium | 155.9                        | 14.3 | 0.00061               | 0.00008 |
| PLGA high   | 170.1                        | 34.8 | 0.00064               | 0.00007 |
